# Supplementary material for: Knock-Down of Endogenous Bornavirus-Like Nucleoprotein 1 Inhibits Cell Growth and Induces Apoptosis in Human Oligodendroglia Cells
Source: PubMed Central journal article supplement (PMC4848891; doi:10.3390/ijms17040435), 2016-03-24
Supplement: ijms-17-00435-s001.pdf [file ijms-17-00435-s001.pdf]

# Supplementary Materials: Knock-Down of Endogenous Bornavirus-Like Nucleoprotein 1 Inhibits Cell Growth and Induces Apoptosis in Human Oligodendroglia Cells

Peng He, Lin Sun, Dan Zhu, Hong Zhang, Liang Zhang, Yujie Guo, Siwen Liu, Jingjing Zhou, Xiaoyan Xu and Peng Xie

**Table S1.** Top 100 most-changed genes between LV-EBLN1-shRNA and LV-NC-shRNA groups.

| Regulation | Gene Symbol                                                                                                                                                                                                                                                                                                                                                                                     |
|------------|-------------------------------------------------------------------------------------------------------------------------------------------------------------------------------------------------------------------------------------------------------------------------------------------------------------------------------------------------------------------------------------------------|
| Down       | <i>KRTAP2-4, FLRT2, DIDO1, FAT4, ESCO2, ZNF804A, SUV420H1, ZC3H4, YAE1D1, NCOA5, ESM1, INTS7, RIMS2, TRAK2, STXBP5, BTBD7, RIN2, PRMT6, DNAJB6, CEP19, BRI3BP, HAUS6, CSTF3, ZNF480, GHR, THEM4, FAM111B, ZNF75A, CHAC2, TRIM2, NRP1, C3orf23, C7orf49, ZNF789, MOCS3, MBLAC2, ZNF189, ADAMTS5, ZNF252P, LARP4, HIST1H2BD, SFPQ, DNAJC11, IFNAR1, PIGM, CSR2BP, KCNMA1, ARL14, VANGL1, PCLO</i> |
| Up         | <i>PI3, RND3, BLZF1, LOC100129518, EPGN, SBSN, INSIG1, OSMR, CREB3L2, MSMO1, FBN2, SCD, C15orf48, ATF7IP, ARG2, SFT2D3, SAT1, ATF3, LOC100287223, CFB, GATSL3, THBD, CCL20, DHDH, HBP1, CLK1, RPL28, DUSP16, C3, KLHL24, DDIT3, GBP2, KLF3, C1R, PER1, GEM, LDLR, KLF9, ANKHD1, CDC16, IGF2, CDKN1C, HMGCS1, ZFP36, BBC3, PTGES, TMEM41B, RAB18, LOC100506403, SIK1</i>                         |

**Table S2.** Primers of qRT-PCR for Top 20 most-changed genes.

| Gene Name       | Forward Primer (5'-3')    | Reverse Primer (5'-3')  |
|-----------------|---------------------------|-------------------------|
| <i>BLZF1</i>    | ACAGACAGAGGTAATCGTGAGT    | GGGCTAGACGTTCAAAGTGATAC |
| <i>CREB3L2</i>  | GAGCCAGTTACAGACGAACCAC    | TCTGGCACGAGGAATCAACC    |
| <i>DIDO1</i>    | CCAGAGTCAAAAGGCGTCGG      | CGTGGAGTAAGCTCCTTCGC    |
| <i>EPGN</i>     | GGACAGTTAACAAAACAGAAGCTGA | AGCTCATGGTGAATGCACA     |
| <i>ESCO2</i>    | GCTGGCTAGGCTGAGGAGAG      | TCAGTGAAGTGAAAAGGCTGTG  |
| <i>FAT4</i>     | CACCCTACTCAGGACTTCGG      | CCATCAAAACCTGTTTGGGC    |
| <i>FLRT2</i>    | GCGGCGACCCCTAAAACAAT      | CAATCTGCAATCTGACGGCTG   |
| <i>INSIG1</i>   | ATCCAGAGGAATGTCACTCTCTT   | AGGGGTACAGTAGGCCAACAA   |
| <i>KRTAP2-4</i> | ACAGAGCAATACACTGAAGCCT    | GTGGGTGAGGGTGGTAATGG    |
| <i>MSMO1</i>    | GTTGGAACACCTGGCGAGT       | CACAGCCAAGGATGCTGAACT   |
| <i>NCOA5</i>    | ATACGGCTCCATCAAGACCC      | TGGGCTCTCTCCTTGGACTT    |
| <i>OSMR</i>     | CTATCTGAAATCCAAGGCGAGG    | ATTCTGGCTTTAGGTTGTCCAC  |
| <i>PI3</i>      | CCGCTGCTTGAAAGATACTGACTGC | CCTGAATGGGAGGAAGAATGGAC |
| <i>RND3</i>     | CTCTTACCCTGATTCGGATGCT    | GATCAGACTTGCAGCCGACCA   |
| <i>SBSN</i>     | GCTGCTGAATGGCAACCATC      | GATGAAAGGCGTGTGACCG     |
| <i>SOD2</i>     | TTTCAATAAGGAACGGGGACAC    | GTGCTCCACACATCAATCC     |
| <i>SUV420H1</i> | GGTGGTGAATGGCAGGAGAA      | ACCATTACATCTGTTGACCTCC  |
| <i>YAE1D1</i>   | ACTATGGACGACTCCGAGGAA     | TCACACTGGCCAAGTGCATC    |
| <i>ZC3H4</i>    | GAATGATGCCCCCTATCCCG      | CTTCGTAGTGCCCGTAGTCC    |
| <i>ZNF804A</i>  | TTGTCATCAGCTCCACGCAT      | CCTTCTCAGCATAGTCCAGAGT  |
